# Supplementary material
Source: publisher figshare collection journal article supplement (https://geolsoc.figshare.com/ndownloader/files/5421605)
Supplement: Supplementary file 1 [file 5421605]

Table 12.
Assigned n�	Planktonic foraminiferal and calcareous nannofossil biohorizons	Composite depth (m)	Berggren et al., 1995	Wade et al., 2011	Martini (1971)	Okada & Bukry, 1980
1	HO Parvularugoglobigerina eugubina	0.55	P?/P1a	P?/P1a
2	LO Cruciplacolithus intermedius	1.35			NP1/NP2	CP1a/CP1b
3	LO Subbotina triloculinoides	2.3	P1a/P1b	P1a/P1b
4	LO Chiasmolithus danicus	4.87			NP2/NP3	CP1b/CP2
5	LO Globanomalina compressa	5.4	P1b/P1c	P1b/P1c
6	LO Ellipsolithus macellus	7.74			NP3/NP4	CP2/CP3
7	LO Praemurica uncinata	9.8	P1c/P2	P1c/P2
8	LO Morozovella angulata	12.5	P2/P3a	P2/P3a
9	LO Fasciculithus tympaniformis	15			NP4/NP5	CP3/CP4
10	LO Igorina albeari	15.7	P3a/P3b	P3a/P3b
11	LO Globanomalina pseudomenardii	17.9	P3b/P4a	P3b/P4a
12	HO Parasubbotina variospira	18.2		P4a/P4b
13	LO Heliolithus kleimpellii	21.1			NP5/NP6	CP4/CP5
14	LO Discoaster mohleri	23.5			NP6/NP7	CP5/CP6
15	LO Acarinina soldadoensis	24.5	P4b/P4c	P4b/P4c
16	LO Discoaster nobilis	28.29				CP6/CP7
17	HO Globanomalina pseudomenardii	28.84	P4c/P5	P4c/P5
18	LO Discoaster multiradiatus	28.87			NP8/NP9a	CP7/CP8a
19	LO CNET	31.7			NP9a/NP9b	CP8a/CP8b
20	LO Tribrachiatus bramlettei	31.8			NP9b/NP10a
21	LO Acarinina sibaiyaensis	31.88-31.9		P5/E1
22	LO Pseudohastigerina wilcoxensis	32.01-32.03		E1/E2
23	HO Morozovella velascoensis	33	P5/P6a	E2/E3
24	LO Discoaster diastypus	33.5				CP8b/CP9a
25	LO Morozovella formosa	34.2	P6a/P6b	E3/E4
26	LO Tribrachiatus digitalis	35.4			NP10a/ NP10b
27	HO Tribrachiatus digitalis	36.9			NP10b/ NP10c
28	LO Tribrachiatus contortus	37.9			NP10c/ NP10d	CP9a/CP9b
29	HO Tribrachiatus contortus	39.4			NP10d/NP11
30	LO Morozovella aragonensis	42.97	P6b/P7	E4/E5
31	LO Discoaster lodoensis	46.35			NP11/NP12	CP9b/CP10
32	HO Morozovella subbotinae	58.2		E5/E6
33	LO Crepidolithus crassus	58.3				CP10/CP11
34	LO Acarinina cuneicamerata	60.3		E6/E7a
35	HO Tribrachiatus orthostylus	61.8			NP12/NP13
36	LO Planorotalites palmerae	64.8	P8/P9
37	LO Discoaster sublodoensis	71.8			NP13/NP14	CP11/CP12
38	LO Turborotalia frontosa	75.6		E7a/E7b
39	LO Nannotetrina fulgens	91.8			NP14/NP15a	CP12/CP13a
40	LO Guembilitrioides nuttalli	96.7		E7b/E8
41	LO Chiasmolithus gigas	98.8			NP15a/ NP15b	CP13a/ CP13b
42	LO Hantkenina nuttalli	103	P9/P10
43	LO Globigerinatheka kugleri	106.3	P10/P11	E8/E9
44	HO Chiasmolithus gigas	106.8			NP15b/ NP15c	CP13b/ CP13c
45	HO Morozovella aragonensis	117.05	P11/P12	E9/E10
46	LO Reticulofenestra umbilica >14?m	120.8				CP13c/ CP14a
47	HO Guembelitrioides nuttalli	129.15		E10/E11
48	LO Orbulinoides beckmanni	135.8	P12/P13	E11/E12
49	HO Orbulinoides beckmanni	138.8	P13/P14	E12/E13
50	HO Chiasmolithus solitus	143.3			NP16/NP17	CP14a/ CP14b
51	LO Chiasmolithus oamaruensis	157.3			NP17/NP18
52	HO Morozovelloides crassatus	158.3		E13/E14
53	HO Chiasmolithus grandis	158.8				CP14b/ CP15a
54	LO Globigerinatheka semiinvoluta	159.8	P14/P15
55	LCO Isthmolithus recurvus	169.7			NP18/NP19	CP15a/ CP15b
56	HO Globigerinatheka semiinvoluta	171.5		E14/E15
57	HO Chiasmolithus oamaruensis	172.25			NP19/NP20
58	LO Turborotalia cunialensis	174.2	P15/P16
59	HO Globigerinatheka index	180.2		E15/E16
60	HO Discoaster barbadiensis, Discoaster saipanensis	180.3			NP20/ NP21	CP15b/ CP16a
61	HO Cribrohantkenina inflata	181.7	P16/P17
62	HO Turborotalia cocoaensis, Turborotalia cunialensis	185.3	P17/P18
63	HO Hantkeninidae	185.7		E16/O1
64	AB Clausicoccus obrutus	186.1				CP16a/ CP16b
65	HO Ericsonia formosa	198			NP21/NP22	CP16b/ CP16c
66	HO Pseudohastigerina spp., Pseudohastigerina naguewichiensis	206.5	P18/P19	O1/O2
67	HO Reticulofenestra umbilica	208.5			NP22/NP23	CP16c/CP17
68	LO Sphenolithus ciperoensis	234.4			NP23/NP24	CP18/CP19a
69	HO Turborotalia ampliapertura	238.9	P19/P20	O2/O3
70	LO Globigerina angulisuturalis	247.9	P20/P21a	O3/O4
71	HCO Chiloguembelina cubensis	257.9	P21a/P21b	O4/O5
72	HCO Sphenolithus distentus	270.4			NP24/NP25	CP19a/ CP19b
73	HO Paragloborotalia opima	285.3	P21b/P22	O5/O6
74	HCO Dictyococcites bisectus	295.8			NP25/NN1	CP19b/CN1a
75	LO Paragloborotalia kugleri	296.3	P22/M1a	O7/M1a
				Table 12 - Coccioni et al.
